# Supplementary material for: Bias-correcting individual inputs prior to combined calibration leads to more skillful forecasts of reference crop evapotranspiration
Source: Copernicus journal article supplement (doi:10.5194/hess-2021-69), 2021-02-04
Supplement: Supplementary file 1 [file hess-2021-69-supplement.pdf]

## **Supplementary Material**

### **Bias-correcting individual inputs prior to combined calibration leads to more skillful forecasts of reference crop evapotranspiration**

Qichun Yang<sup>a,\*</sup>, Quan J Wang<sup>a</sup>, Kirsti Hakala<sup>a</sup>, Yating Tang<sup>a</sup>

a. Department of Infrastructure Engineering, The University of Melbourne, Parkville 3010, Australia

\*: Corresponding author

E-mail address: qichun.yang@unimelb.edu.au;

Telephone number: +61 411359526

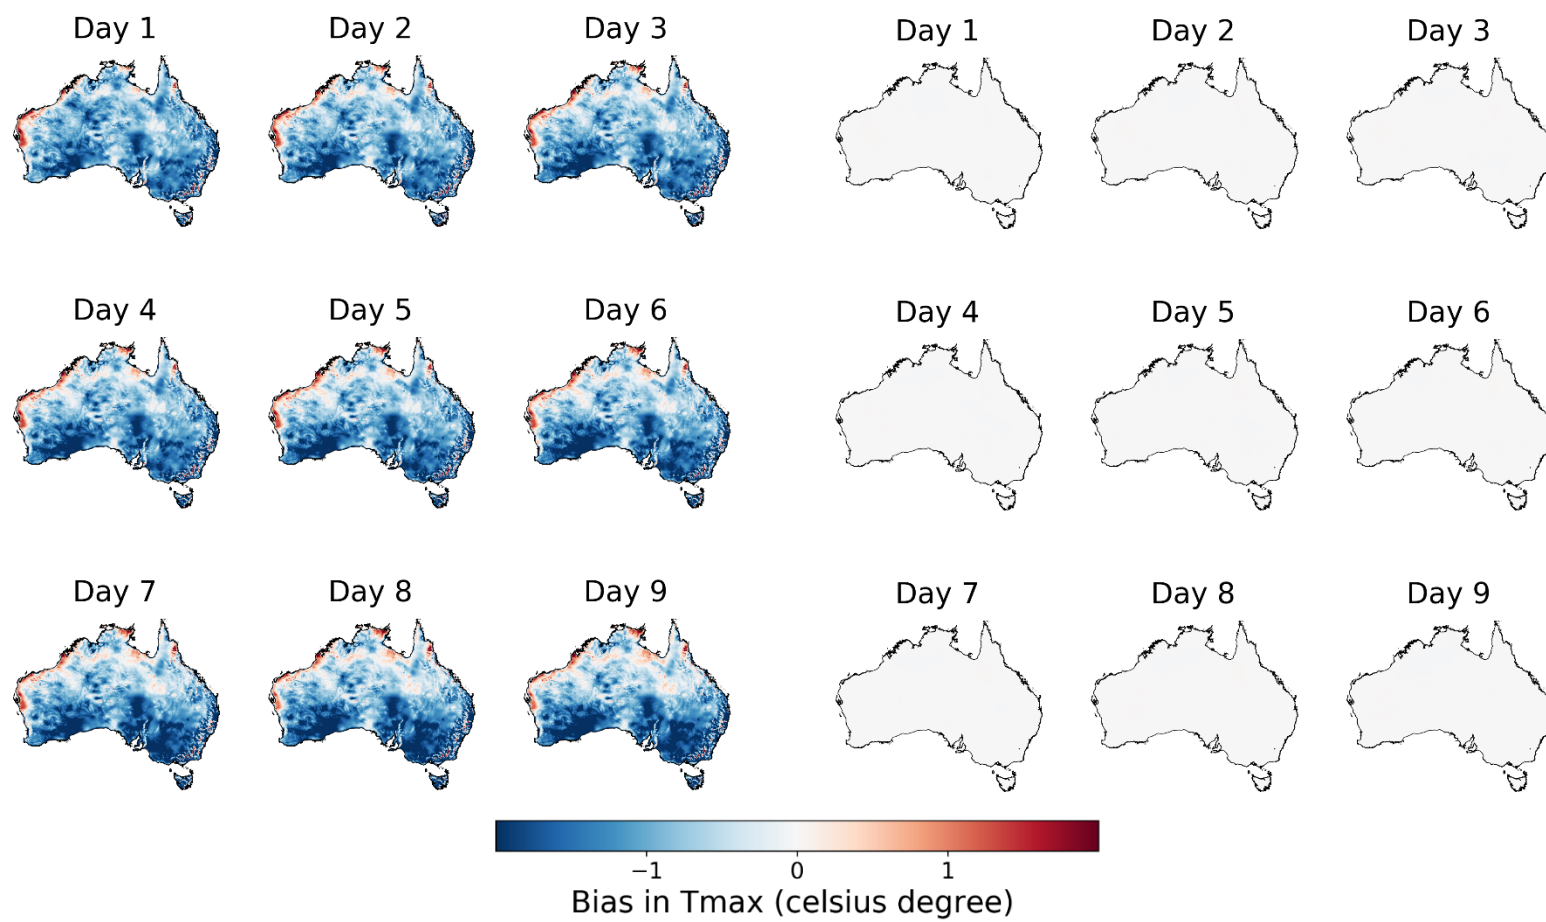

Figure S1. Bias in the (left three panels) raw and (right three panels) bias-corrected  $T_{max}$  forecasts

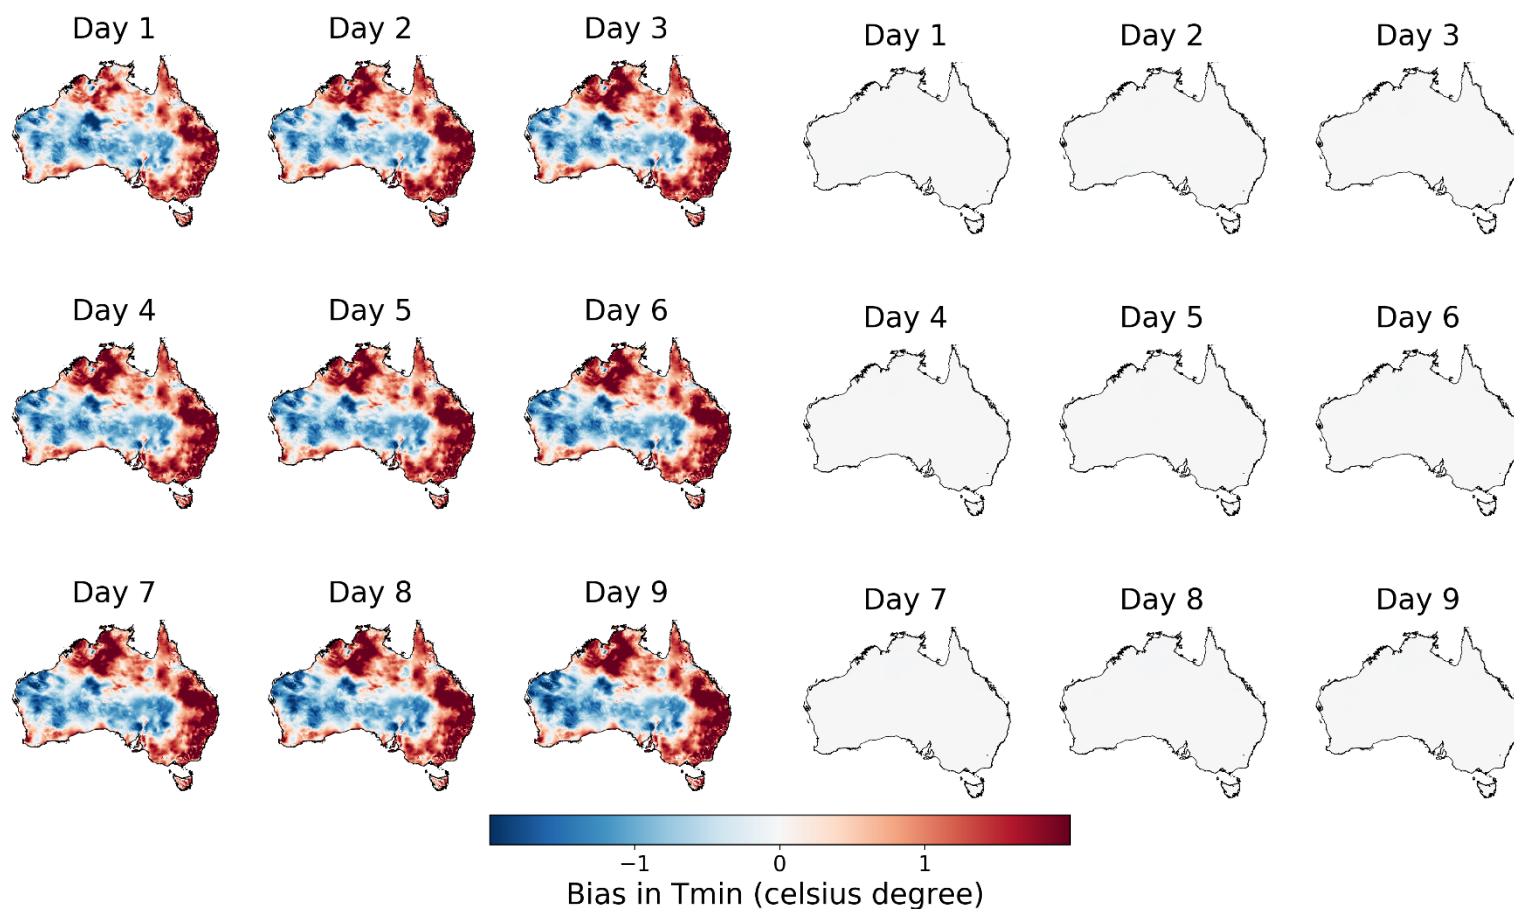

*Figure S2. Bias in the (left three panels) raw and (right three panels) bias-corrected Tmin forecasts*

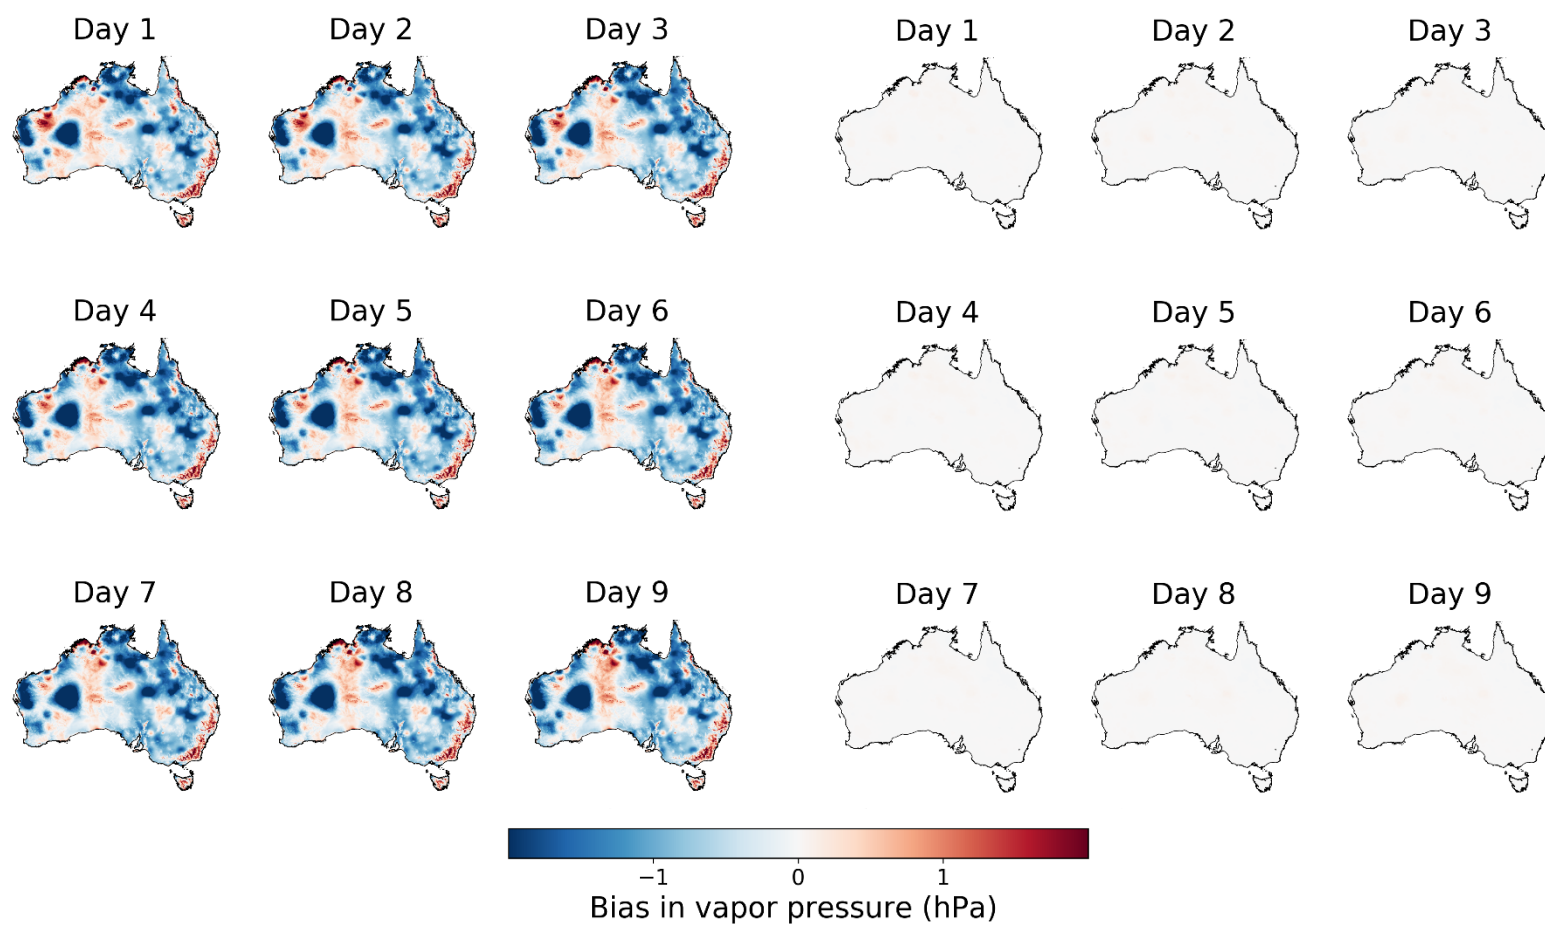

*Figure S3. Bias in the (left three panels) raw and (right three panels) bias-corrected vapor pressure forecasts*

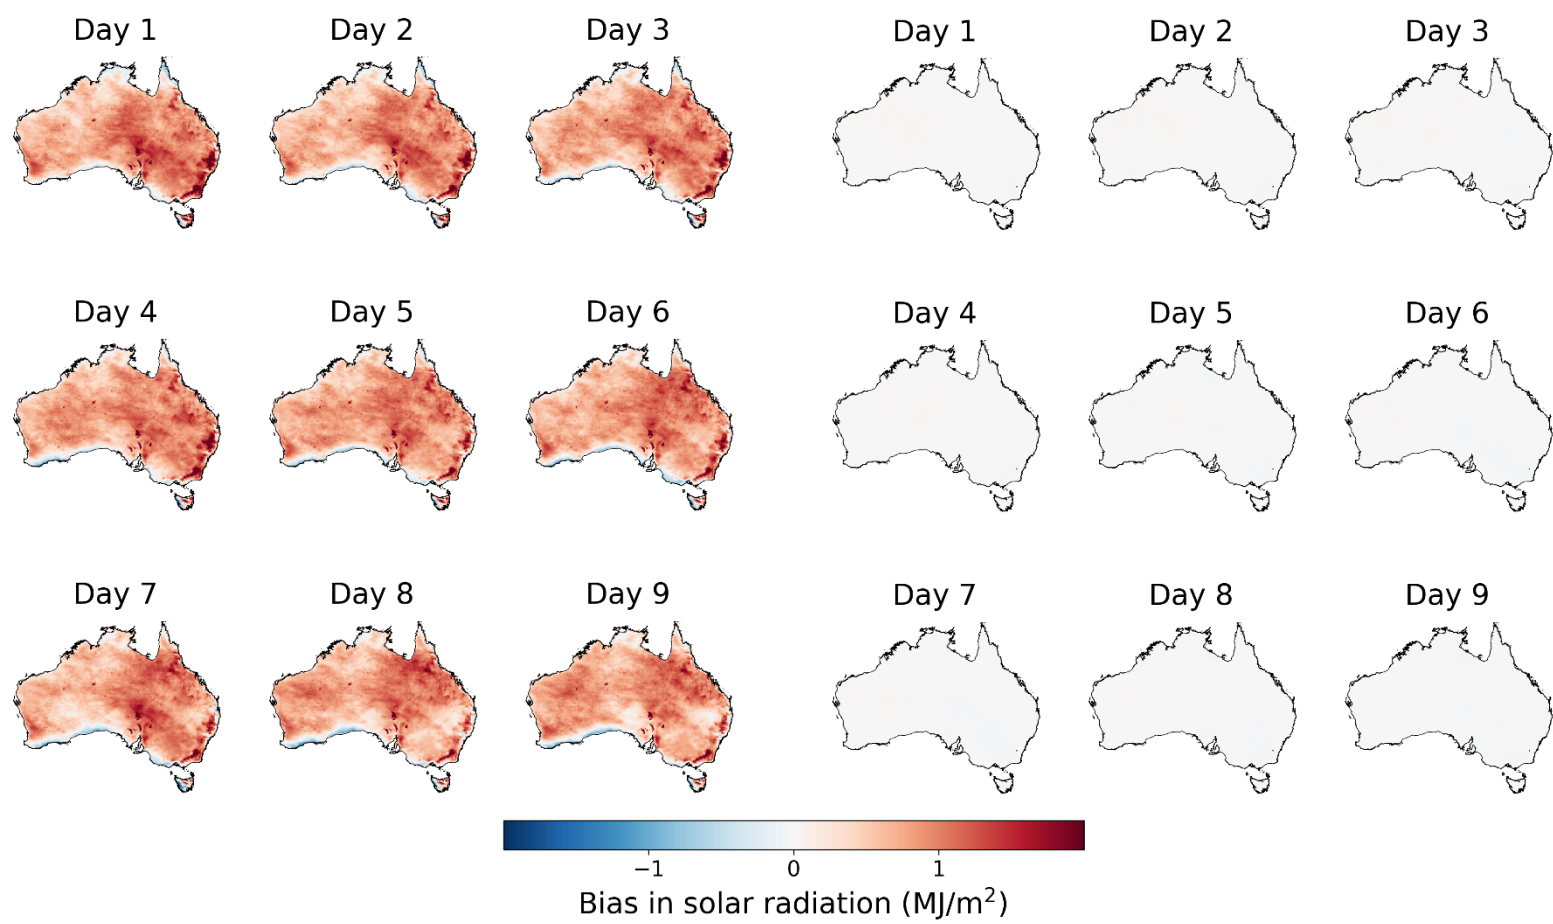

Figure S4. Bias in the (left three panels) raw and (right three panels) bias-corrected solar radiation forecasts

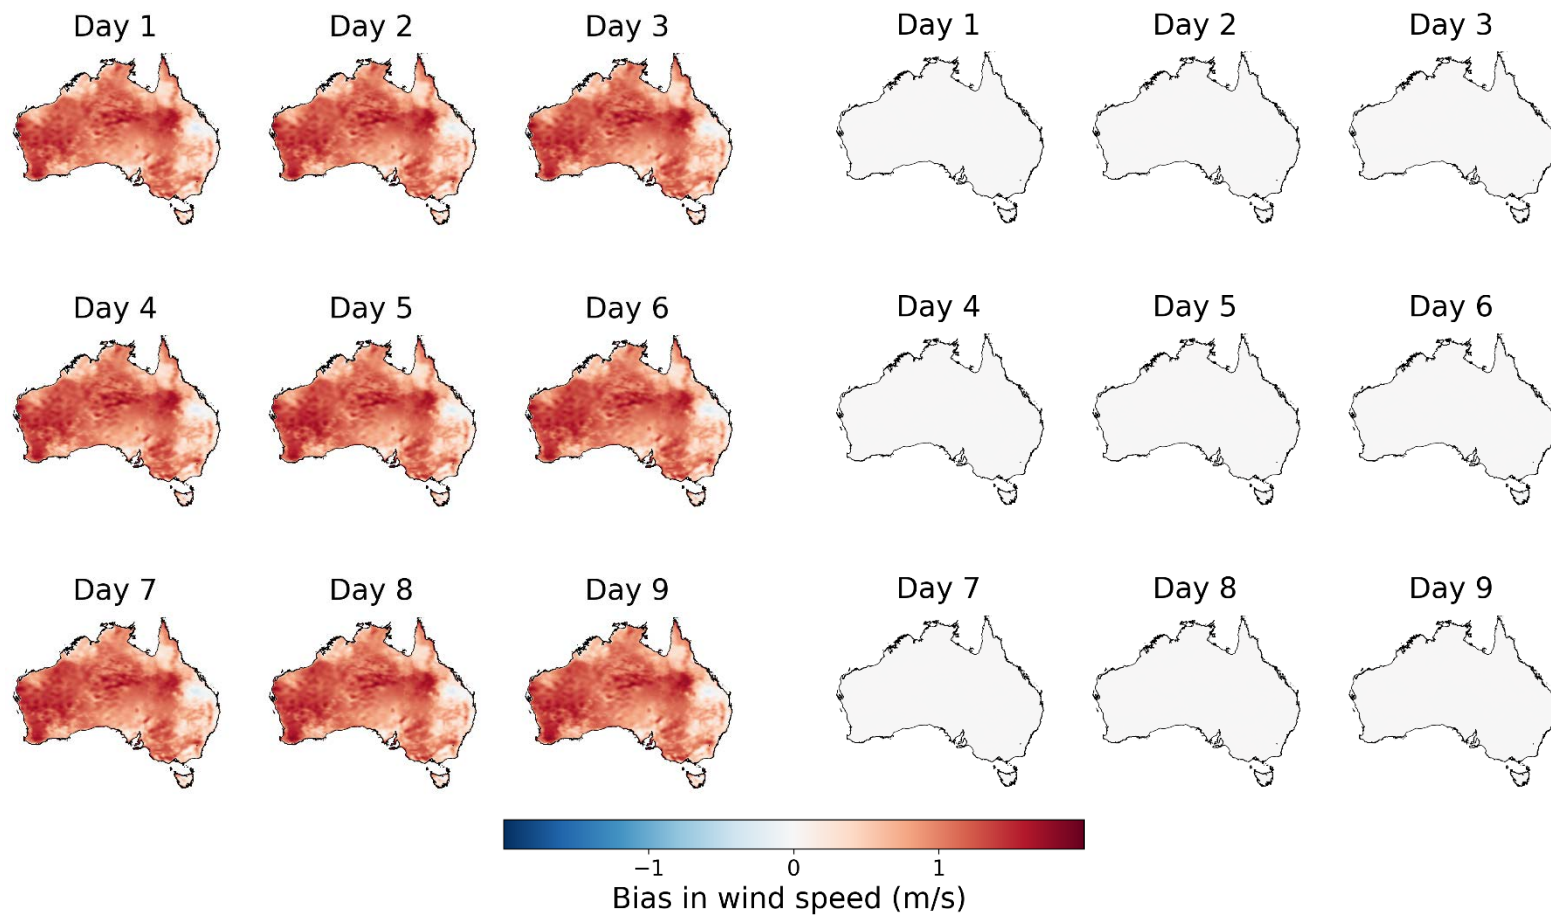

*Figure S5. Bias in the (left three panels) raw and (right three panels) bias-corrected wind speed forecasts*

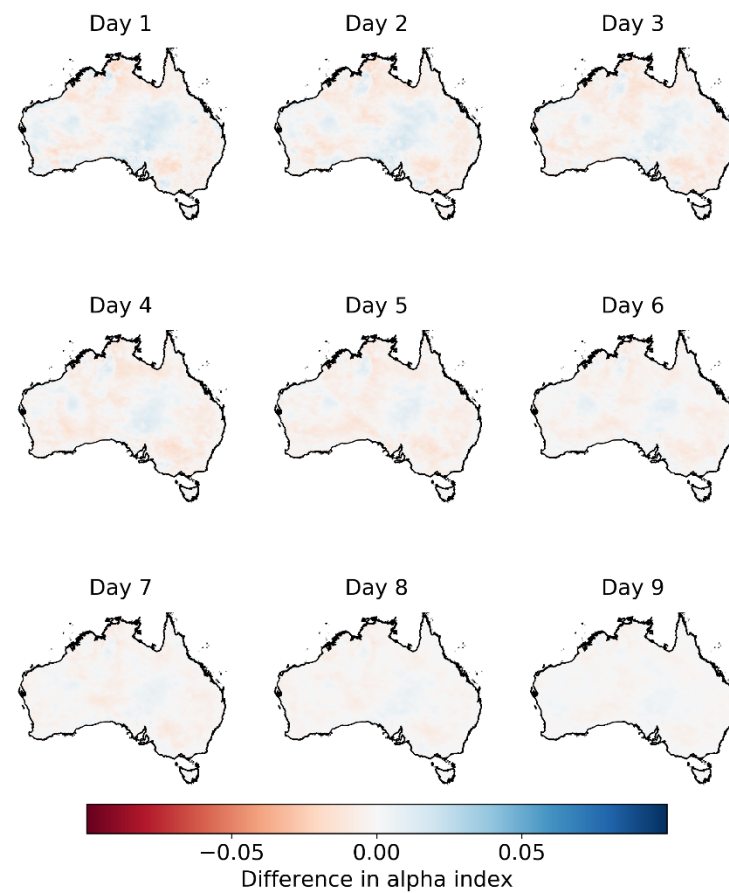

*Figure S6. Differences in alpha index of calibrated forecasts between Calibration 2 and Calibration 1*

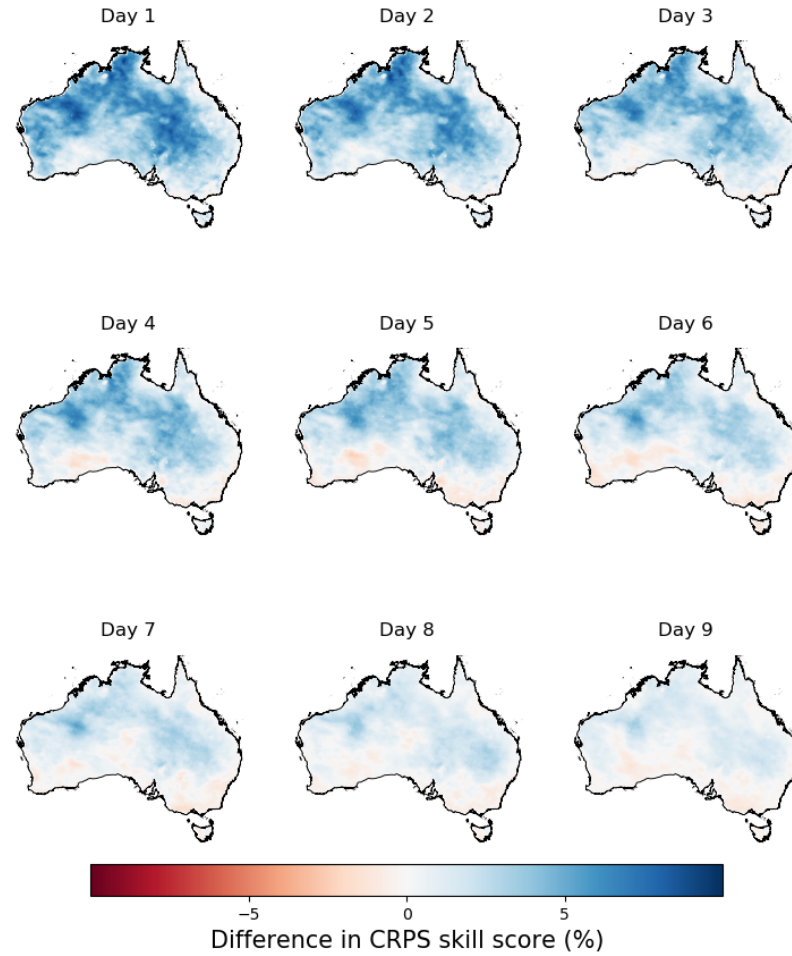

*Figure S7. Differences in CRPS skill score between Calibrations 3 and 4*
