# Supplementary material for: Bias-correcting individual inputs prior to combined calibration leads to more skillful forecasts of reference crop evapotranspiration
Source: Copernicus journal article supplement (doi:10.5194/hess-2021-69), 2021-02-04
Supplement: Supplementary file [file hess-2021-69-RC1-supplement.pdf]

Review to Yang et al., 2021, Bias-correcting individual inputs prior to combined calibration leads to more skillful forecasts of reference crop evapotranspiration. HESSD.

In this study, the authors investigated a critical issue in the forecasting of short-term reference crop evapotranspiration (ET<sub>o</sub>) based on NWP outputs. It is getting popular that weather forecasts from NWP models are used to predict water loss through evapotranspiration. Such information is highly valuable for the effective management of water resources, particularly in arid/semi-arid regions. This investigation develops a new methodology that effectively corrects errors in ET<sub>o</sub> forecasts, and adds extra skills to statistical calibration. I believe this new post-processing strategy could benefit future NWP-based ET<sub>o</sub> forecasting. To improve this work, the authors should pay special attention to the following key issues:

1, Presentation of the results could be improved. Currently, the authors use maps to show/compare results from different model experiments. These figures could demonstrate the spatial patterns of modeling results. However, it might be more useful if the authors could summarize regional results in a different way, such as using box-plots. I believe that will better show readers the overall statistical information across the whole country than simply plotting the results as maps.

2, Implications for ET<sub>o</sub> forecasting at the monthly or seasonal scales should be further discussed. ET<sub>o</sub> forecasting based on monthly or seasonal climate forecasts from GCMs is also widely performed. This study develops the new strategy for short-term forecasts. The applicability of this method to ET<sub>o</sub> forecasting based on GCM forecasts should be briefly discussed, to benefit a broader range of readers.

Specific comments:

Line 20, rewrite this sentence. Not clear

Line 74 Calibrate->calibrate

Line 80 compiled as the inputs.....

Line 95 10m -> 10 m.

Line 107-108, need to clarify what the anomaly and climatological mean are referring to

Line 165 consider rewriting this sentence. Does not read well.

Line 172, what is specific month

Figures in Results: shouldn't the figures be centralized?

Line 360, not calibrate directly, should be without correcting forecasts of the inputs

Line 365, consider rewriting this sentence

Line 377-378, two 'calibration models' consider to rewrite

Line 385, in the calibrated forecasts

Line 386, consider making it shorter and clearer
